# Supplementary material for: Honey and Its Biomimetic Deep Eutectic Solvent Modulate the Antioxidant Activity of Polyphenols
Source: MDPI journal article supplement (doi:10.3390/antiox11112194), 2022-11-06
Supplement: s1 [file s1]

**Figure S1.** HPLC chromatogram of phenolic acids from honey

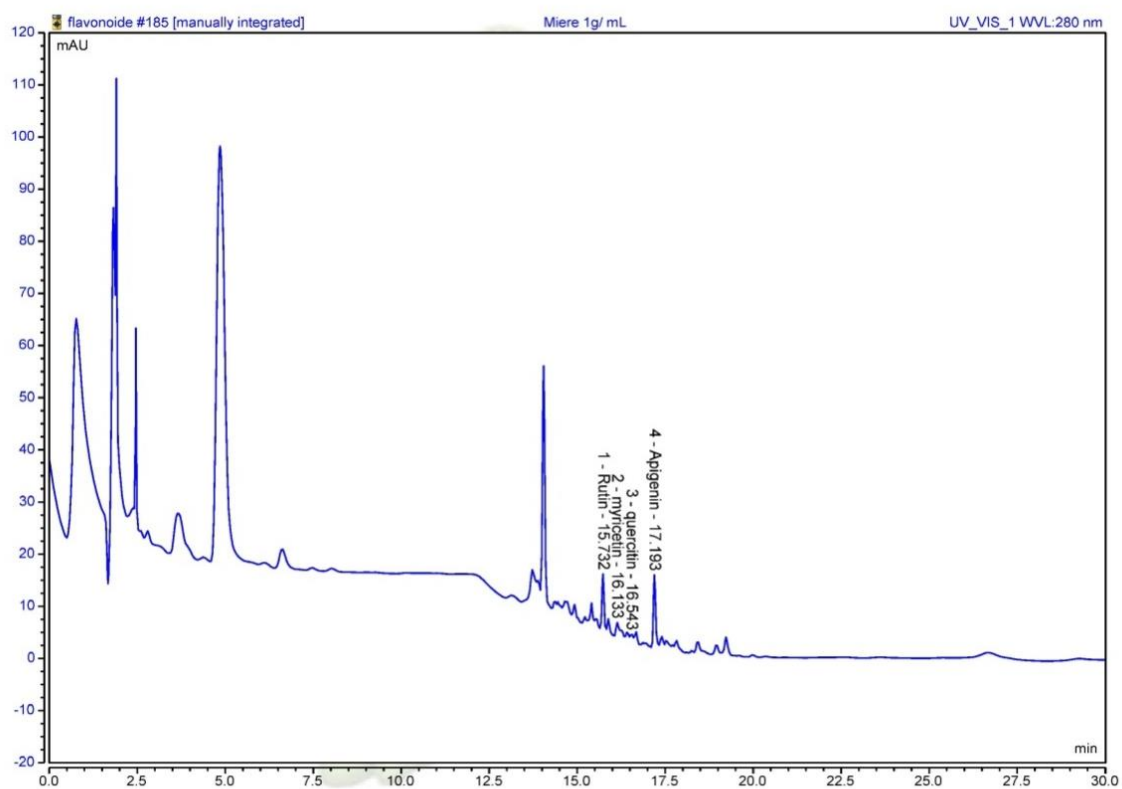

**Figure S2.** HPLC chromatogram of flavonoids from honey

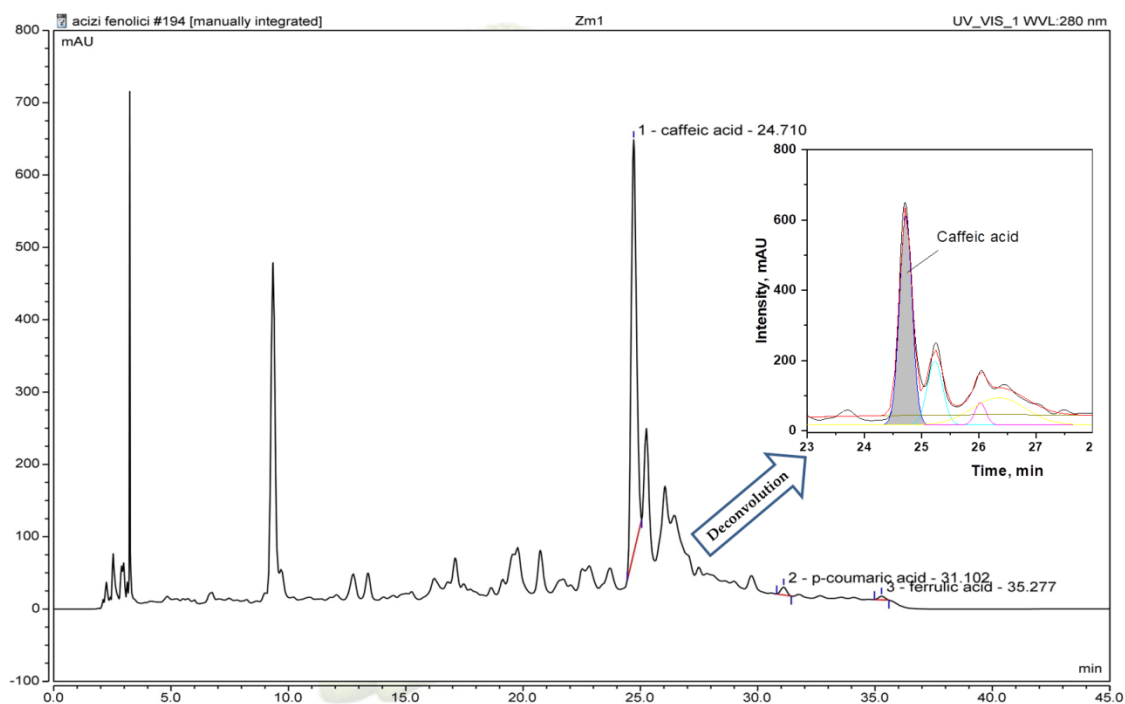

**Figure S3.** HPLC chromatogram of phenolic acids (the red line was set as baseline in HPLC Chromleon 7.0 software for quantification, it was not used for Origin baseline) from raspberry extract and peak deconvolution in Origin (insert). The caffeic acid determined was aprox. 838  $\mu\text{g/g}$  substrate (HPLC) and 770  $\mu\text{g/g}$  substrate (Origin)

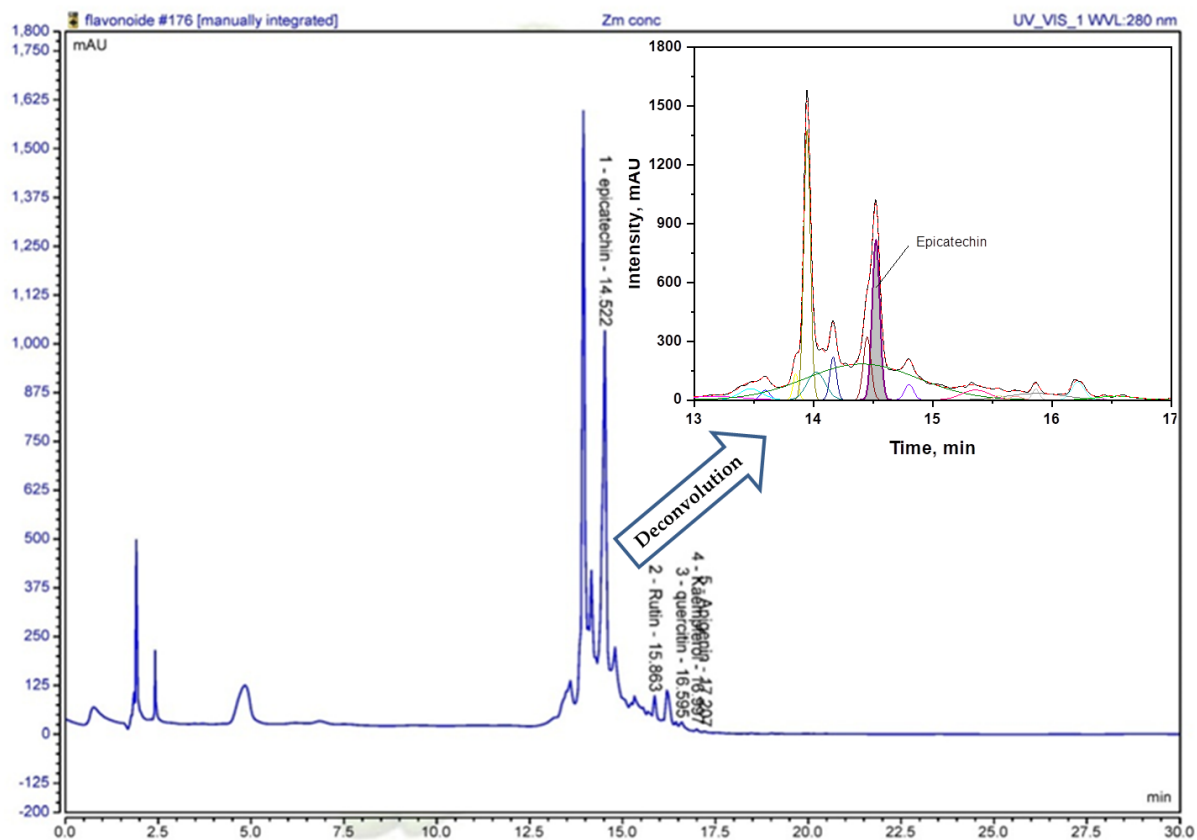

**Figure S4.** HPLC chromatogram of flavonoids from raspberry extract and peak deconvolution in Origin (insert). The caffeic acid determined was aprox. 2262 µg/g substrate (HPLC) and 1684 µg/g substrate (Origin)

**Table S1.** Effect-dose curves for the AOA of honey and honey mixtures with raspberry extract, caffeic acid, epicatechin (H\_RE, H\_CA, and H\_EP respectively). The logarithmic fits in the case of DPPH and ABTS have no physical significance, it is just for better visualization.

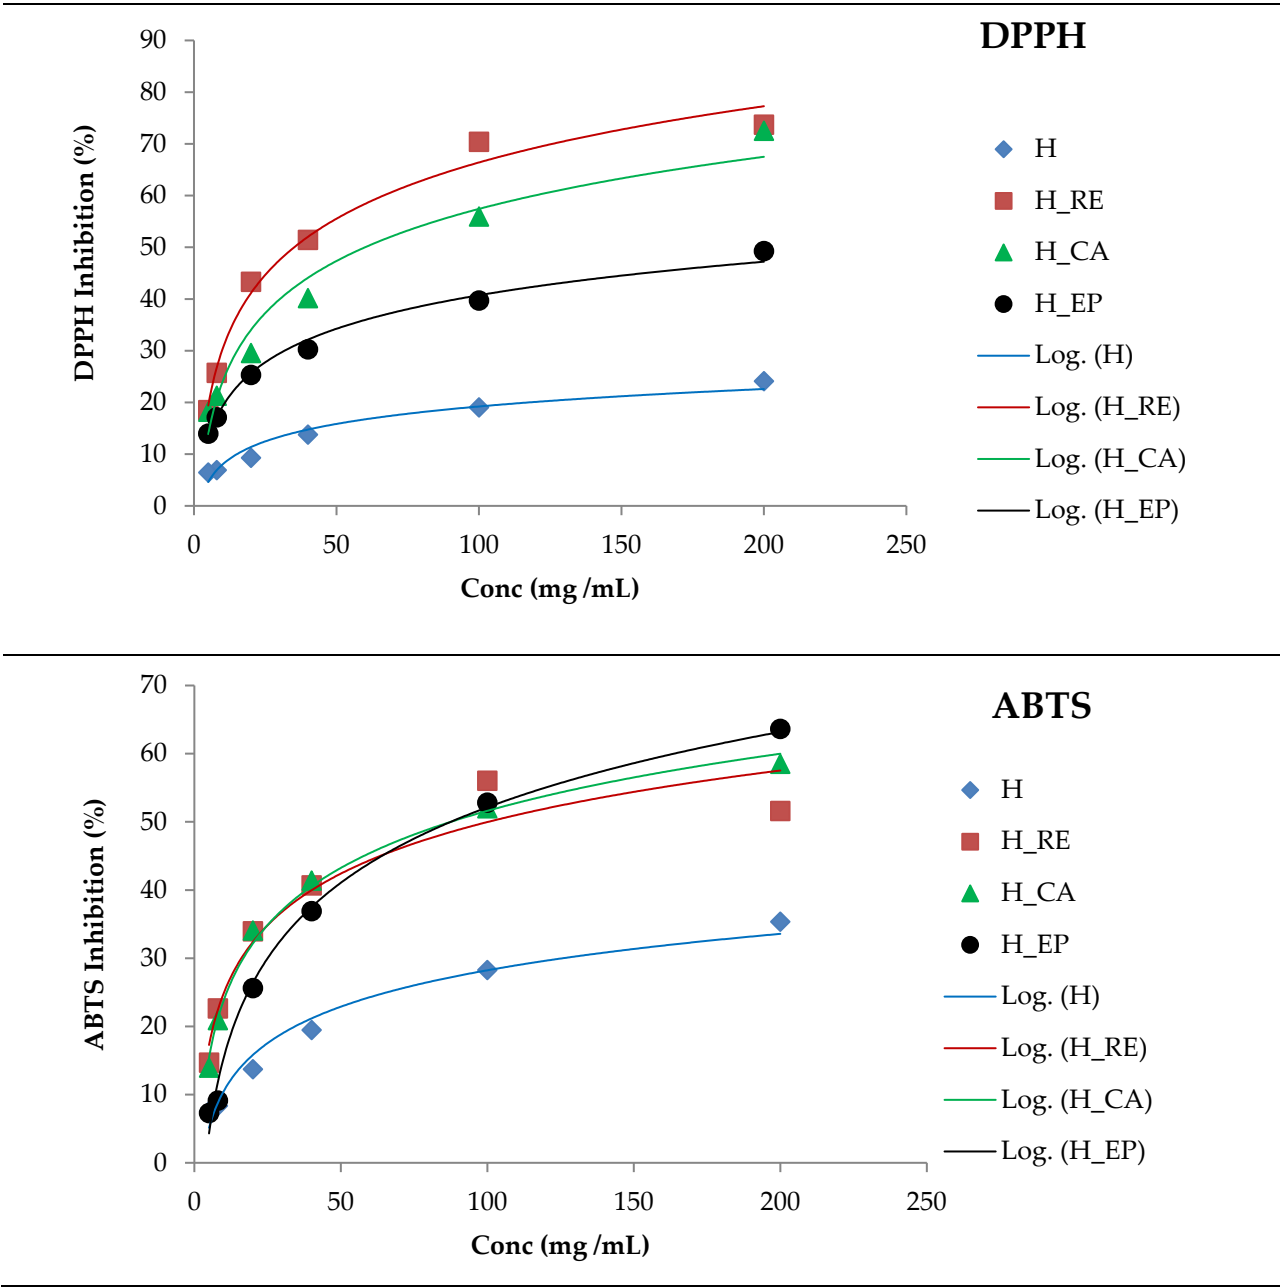

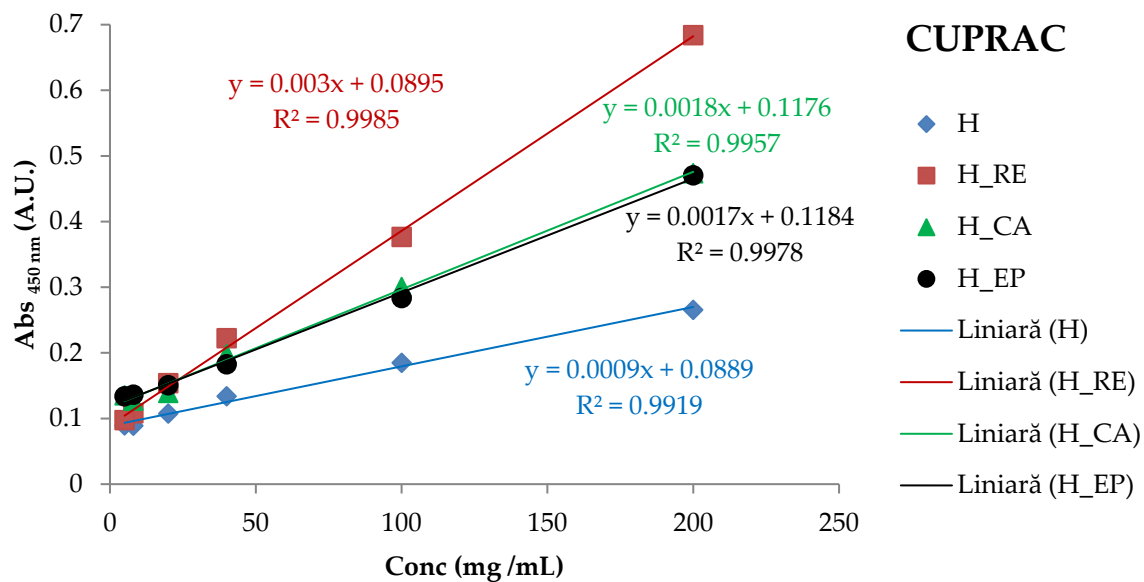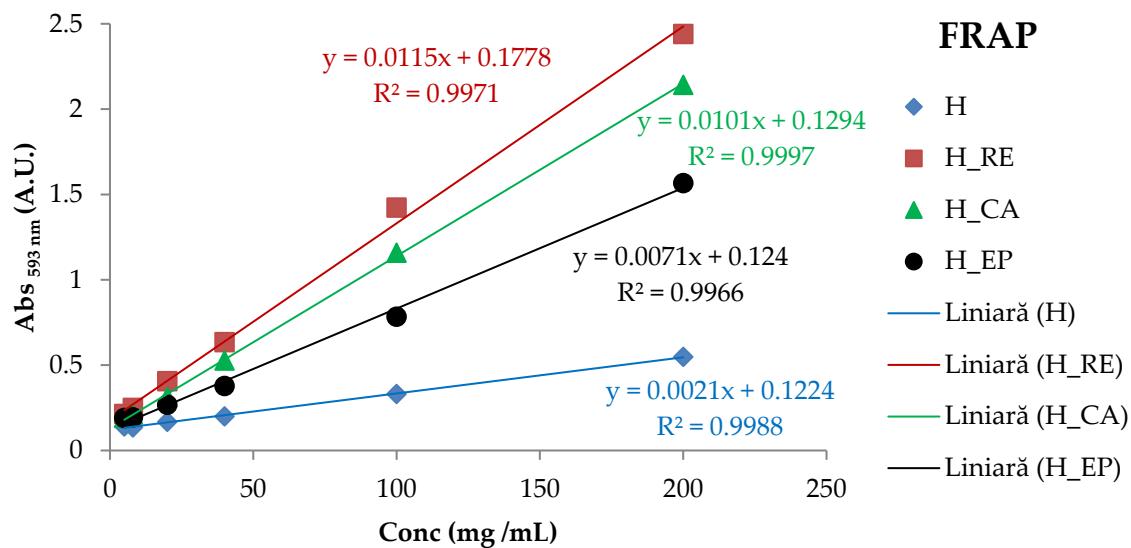

**Table S2.** Concentration dependence of experimental and theoretical AOA for H\_RE mixture. In the case of FRAP and CUPRAC, the theoretical curve (H+RE) was calculated by absorbance addition. In the case of DPPH and ABTS, the theoretical curve was calculated by Webb analysis (see main text).

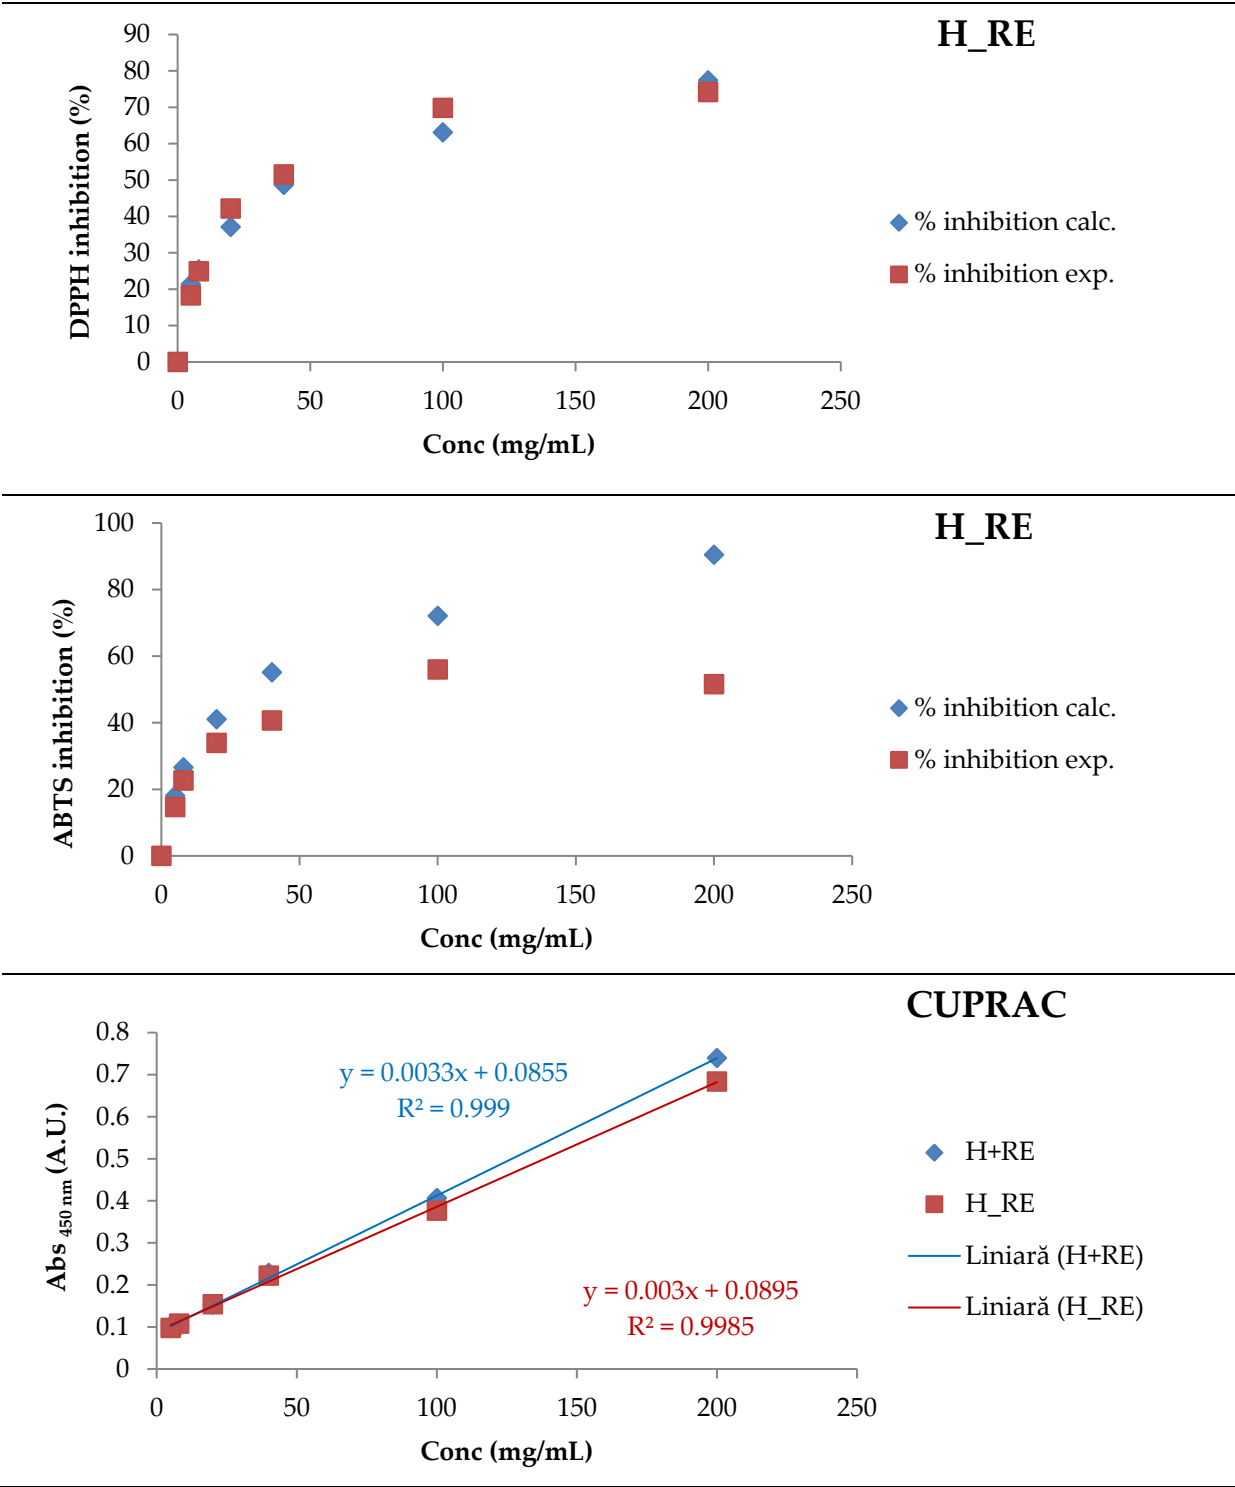

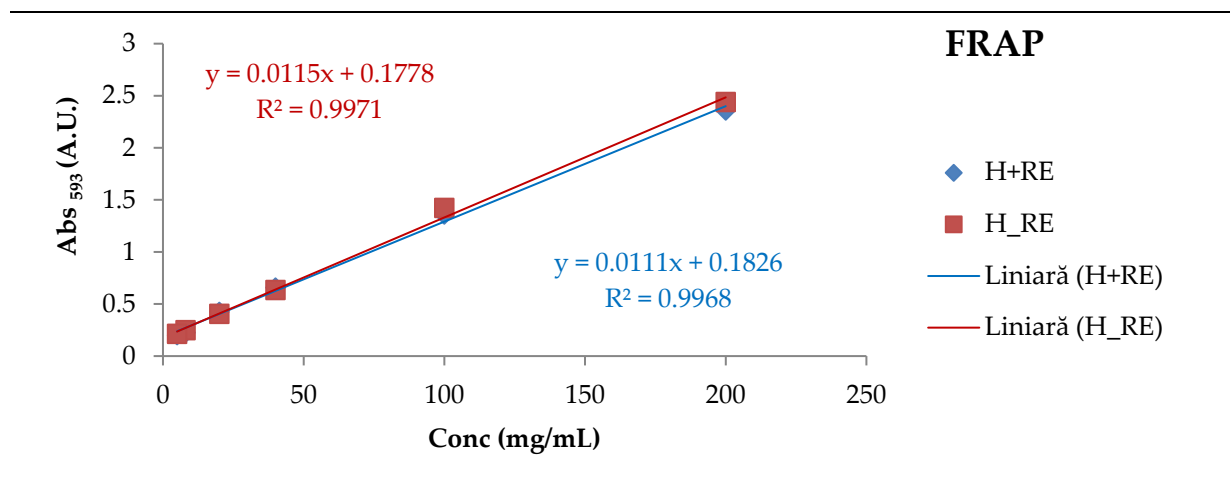

**Table S3.** Concentration dependence of experimental and theoretical AOA for H\_CA and H\_EP mixtures. In the case of FRAP and CUPRAC, the theoretical curve (H+CA / H+EP) was calculated by absorbance addition. In the case of DPPH and ABTS, the theoretical curve was calculated by Webb analysis (see main text).

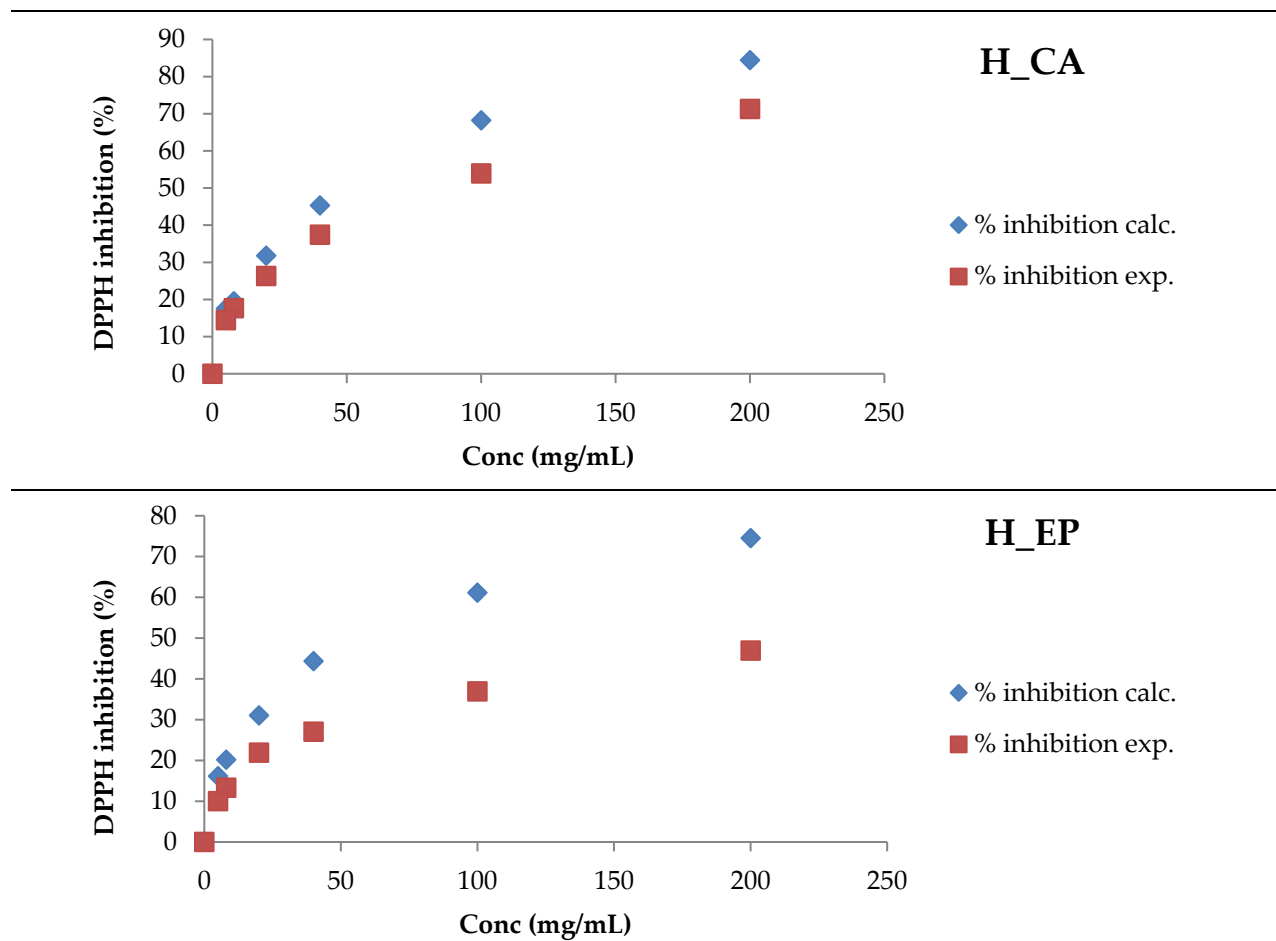



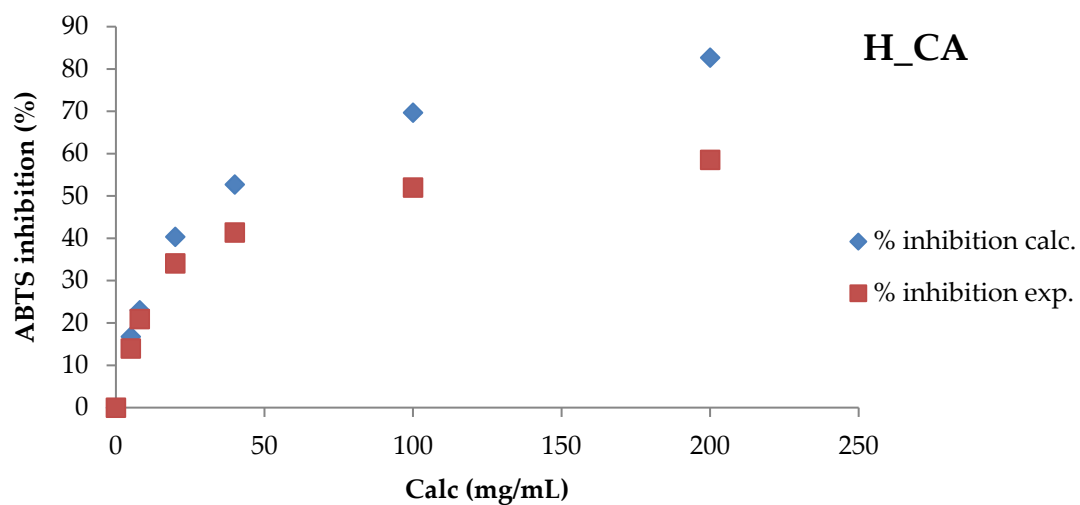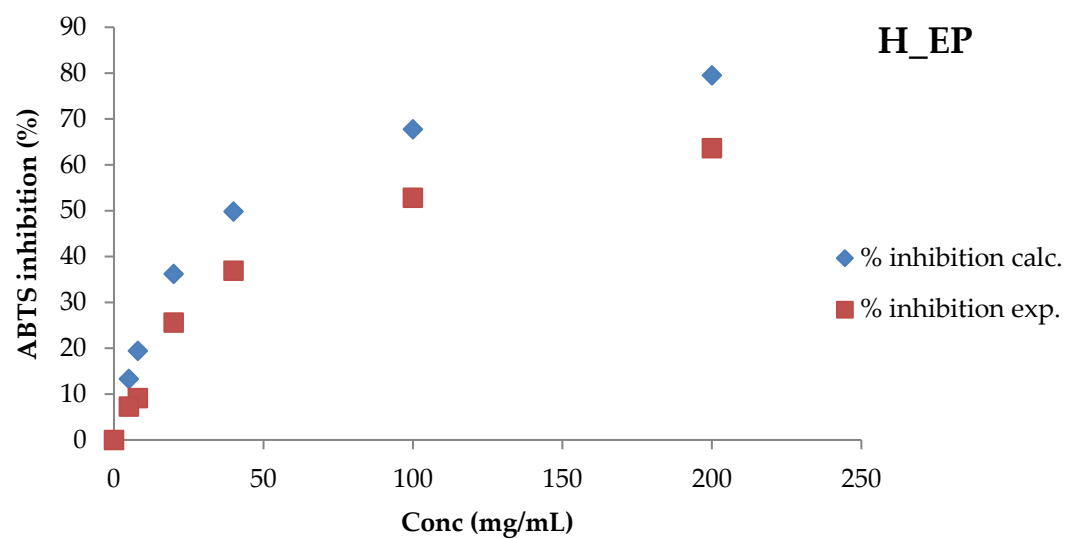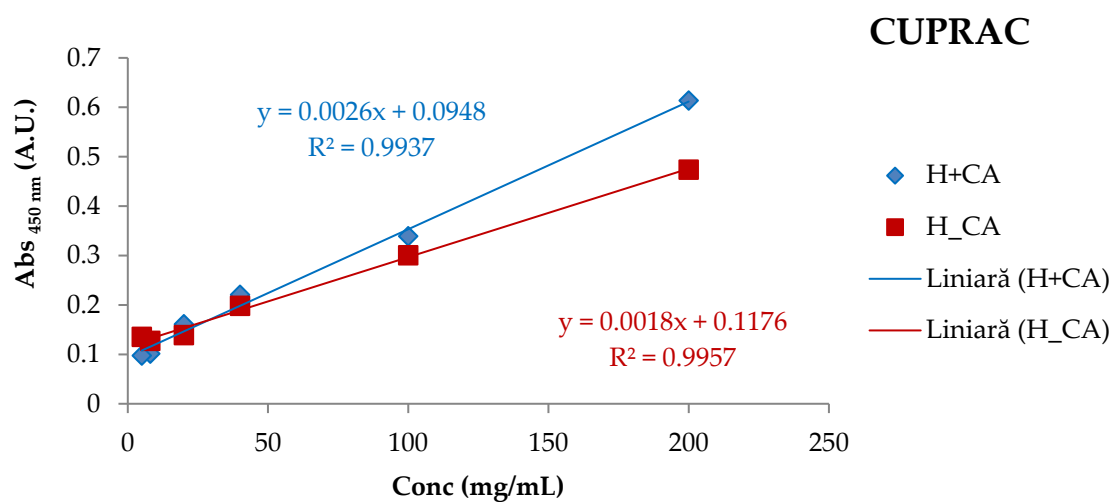

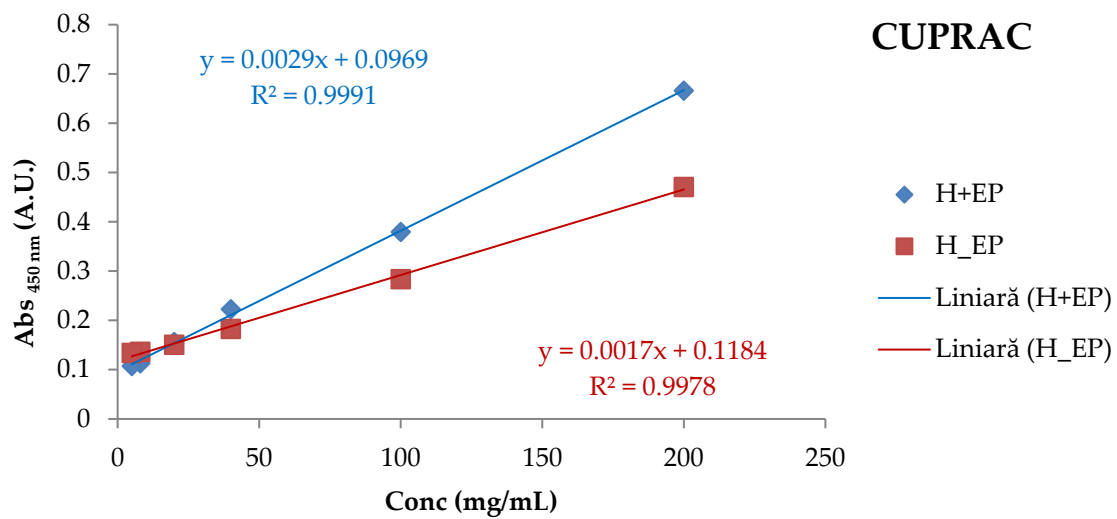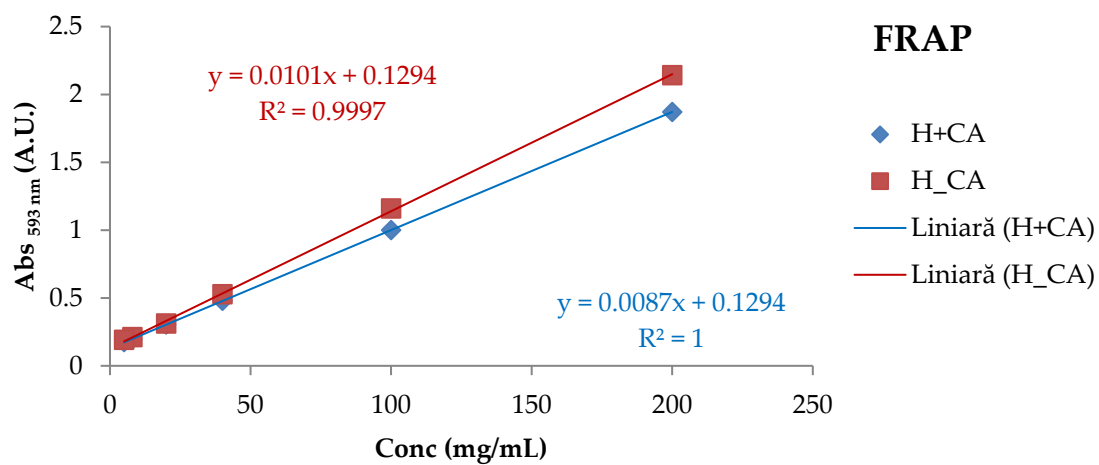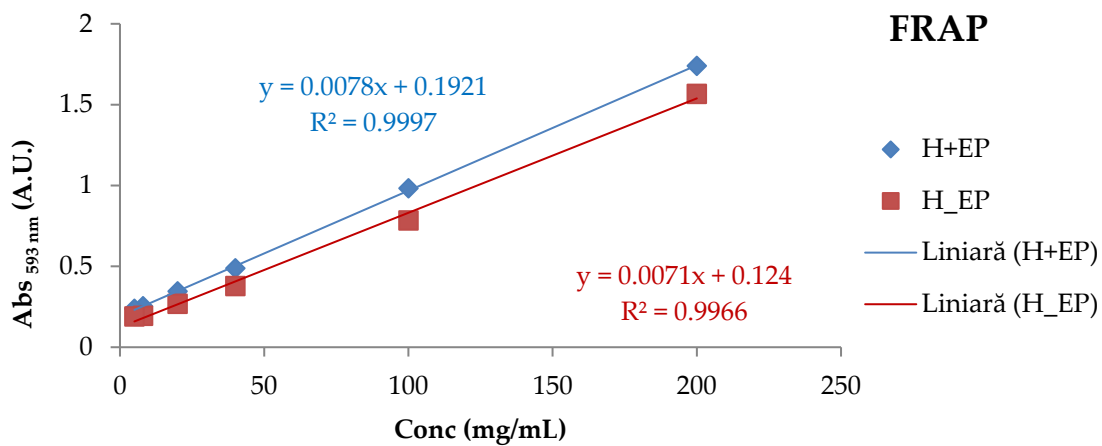

**Table S4.** Effect-dose curves for the AOA of GFSw and GFSw mixtures with raspberry extract, caffeic acid, epicatechin (GFSw\_RE, GFSw\_CA, and GFSw\_EP respectively). The logarithmic fits in the case of DPPH and ABTS have no physical significance, it is just for better visualization.

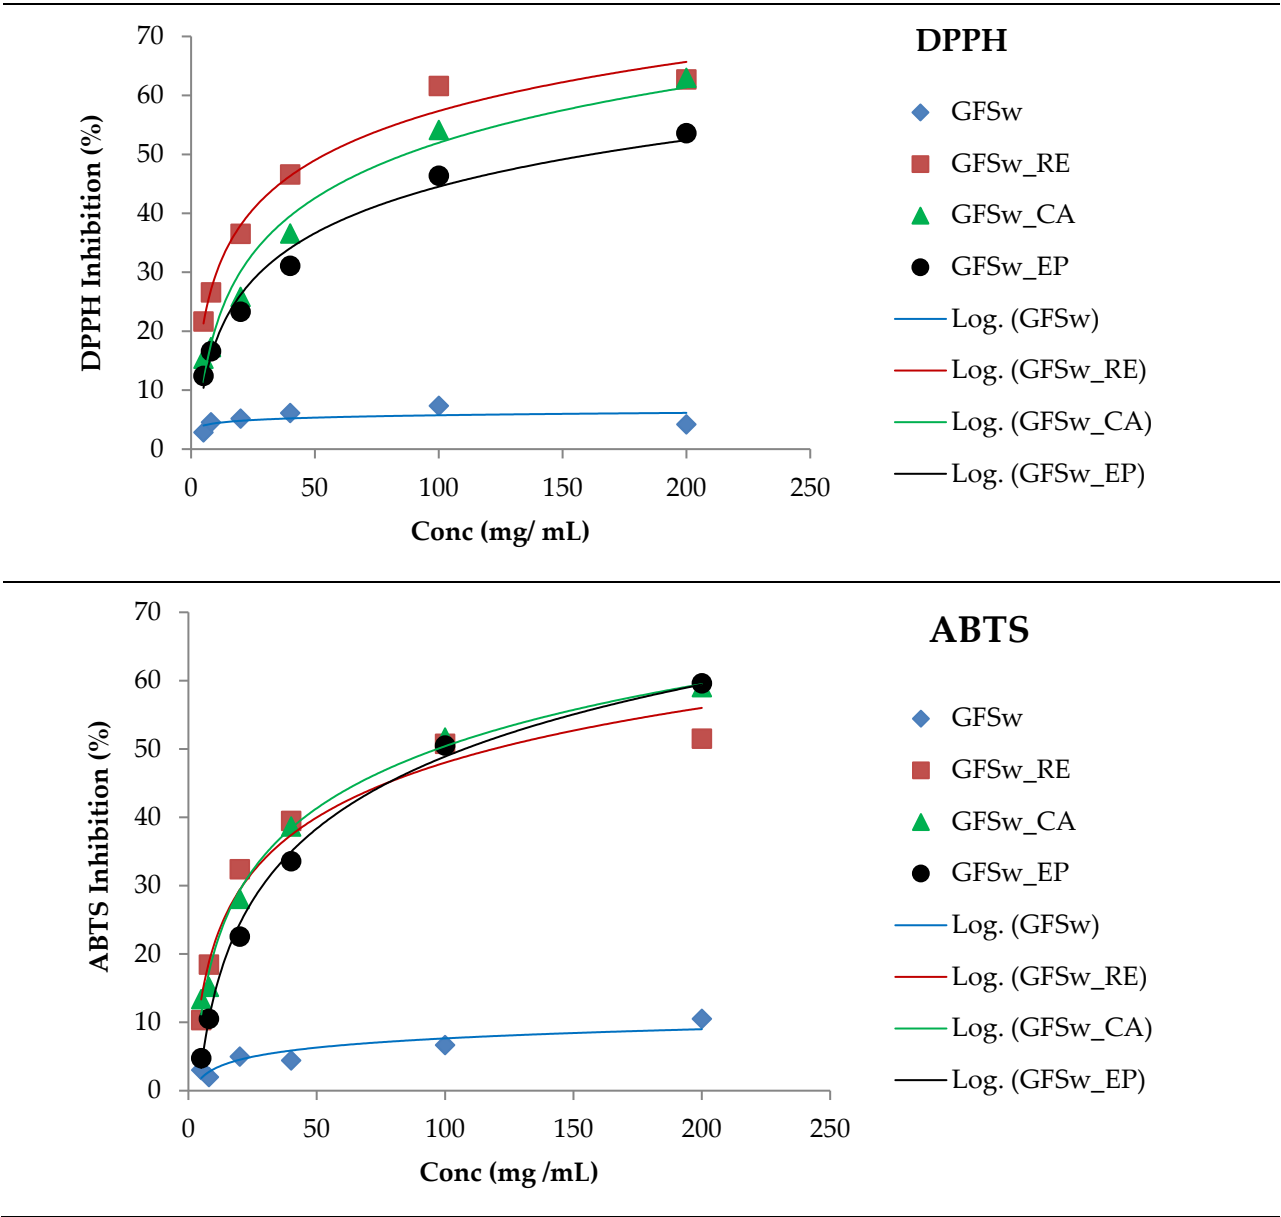

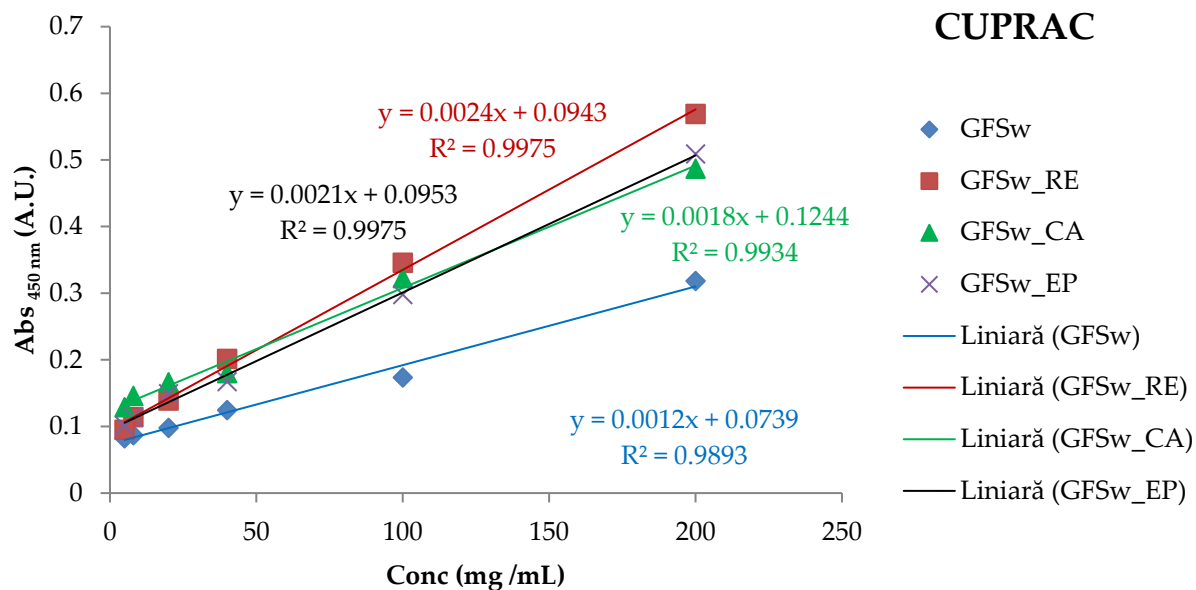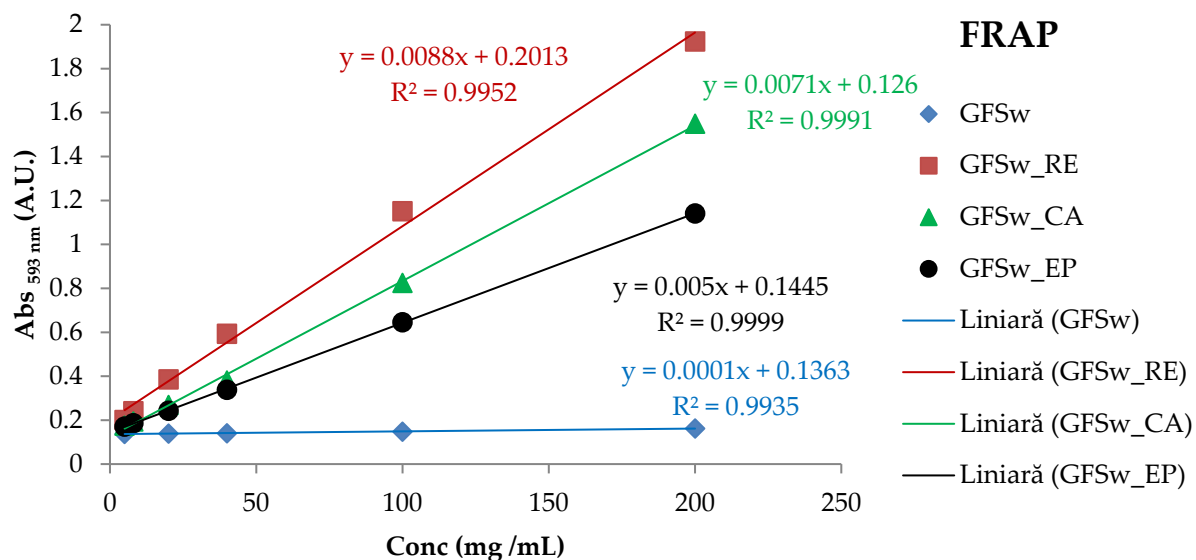

**Table S5.** Concentration dependence of experimental and theoretical AOA for GFSw\_RE, GFSw\_CA and GFSw\_EP mixtures. In the case of FRAP and CUPRAC, the theoretical curve (H+RE / H+CA / H+EP) was calculated by absorbance addition. In the case of DPPH and ABTS, the theoretical curve was calculated by Webb analysis (see main text).

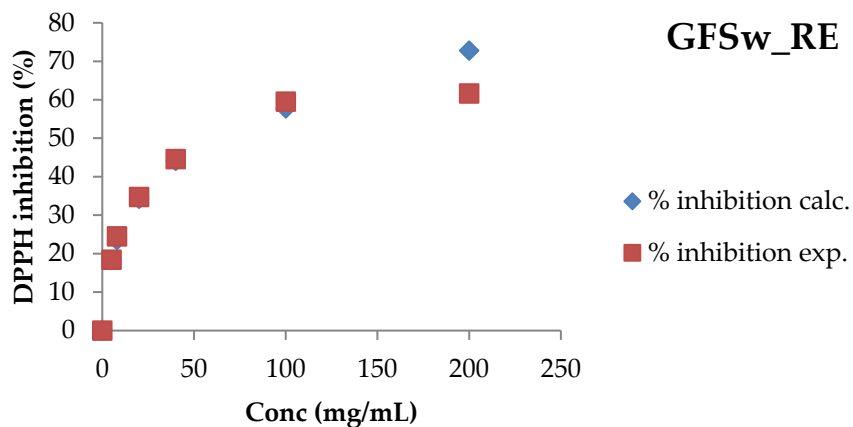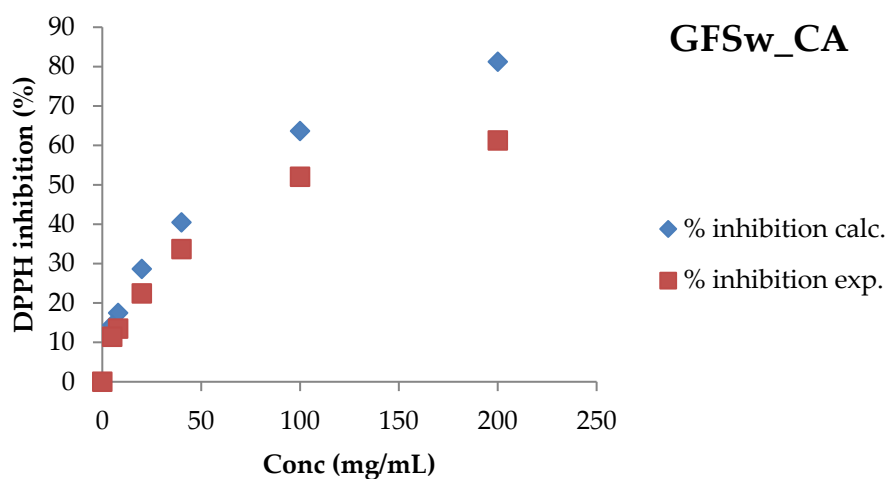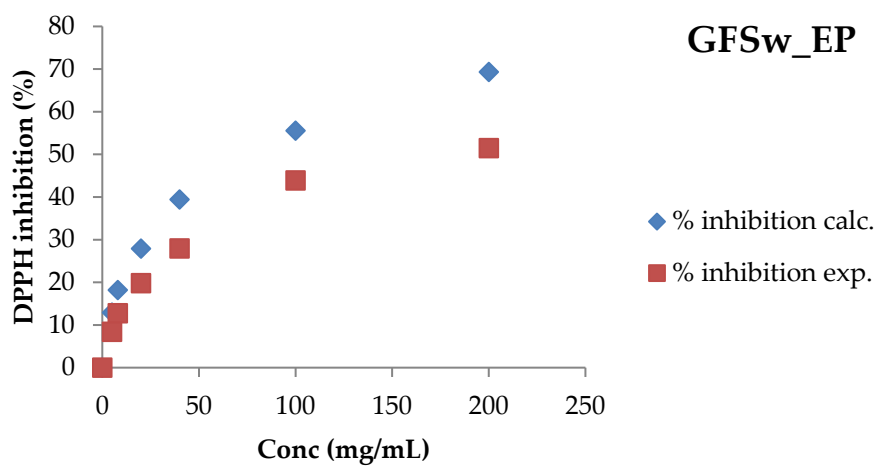

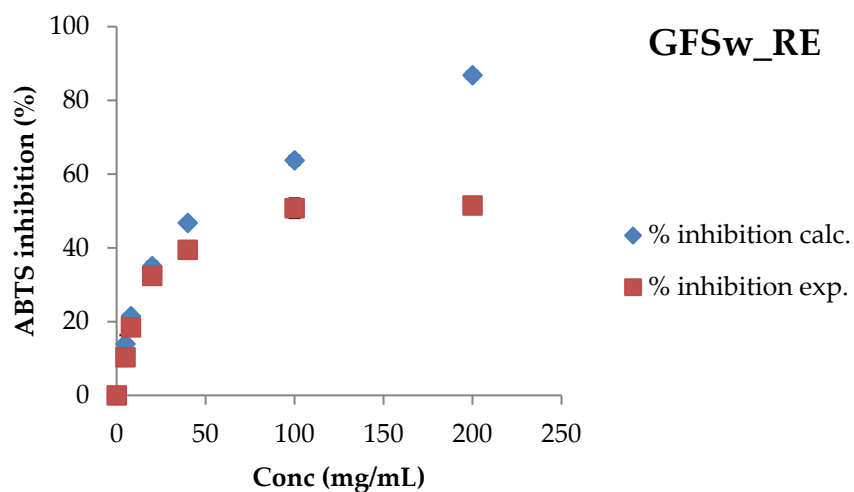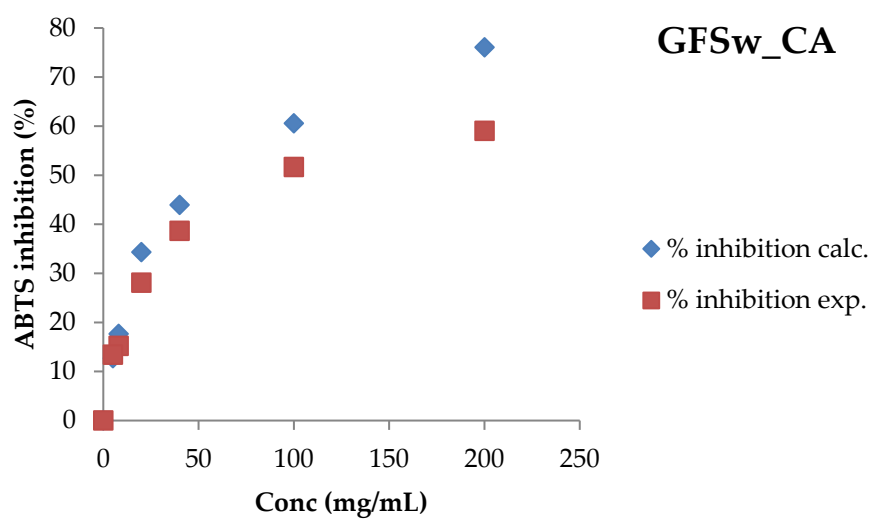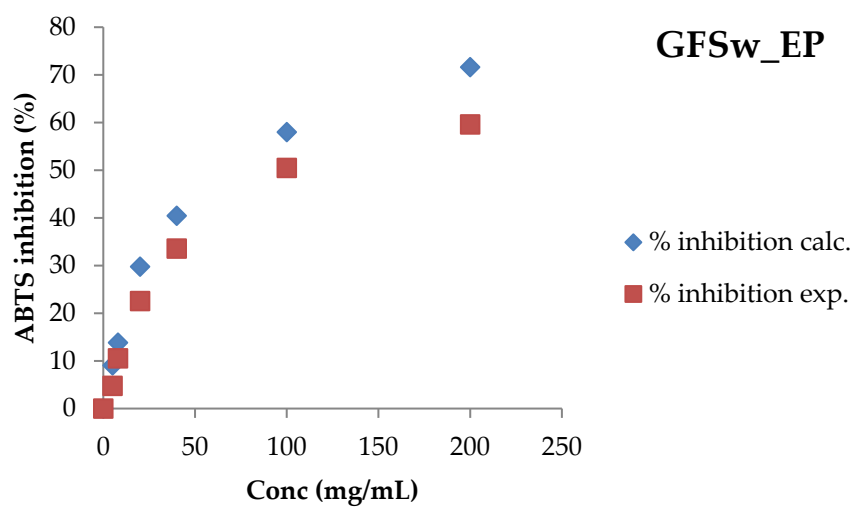

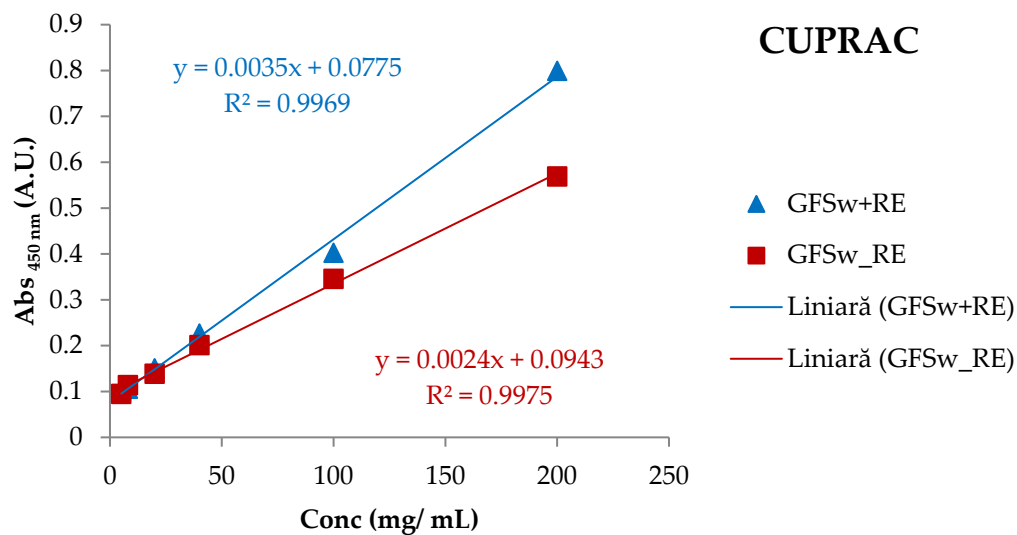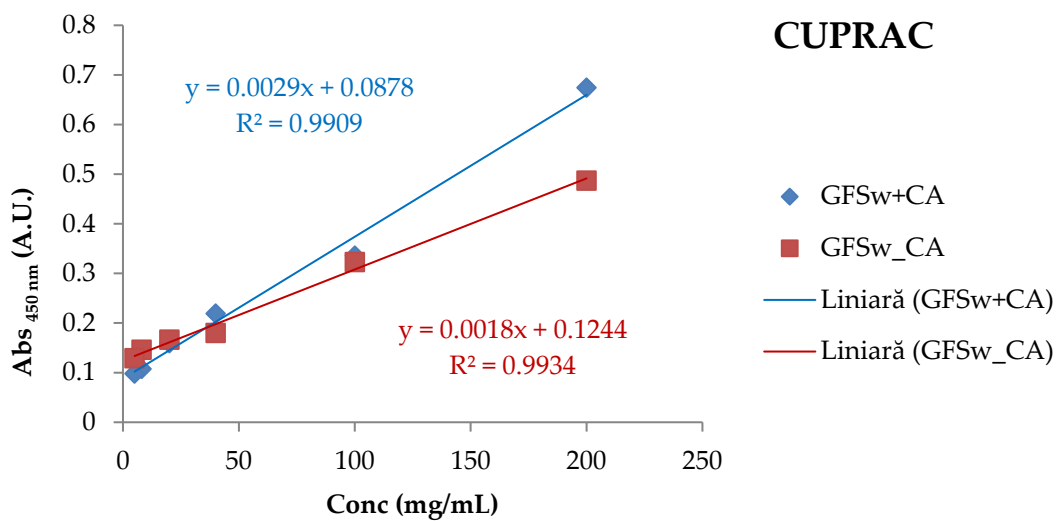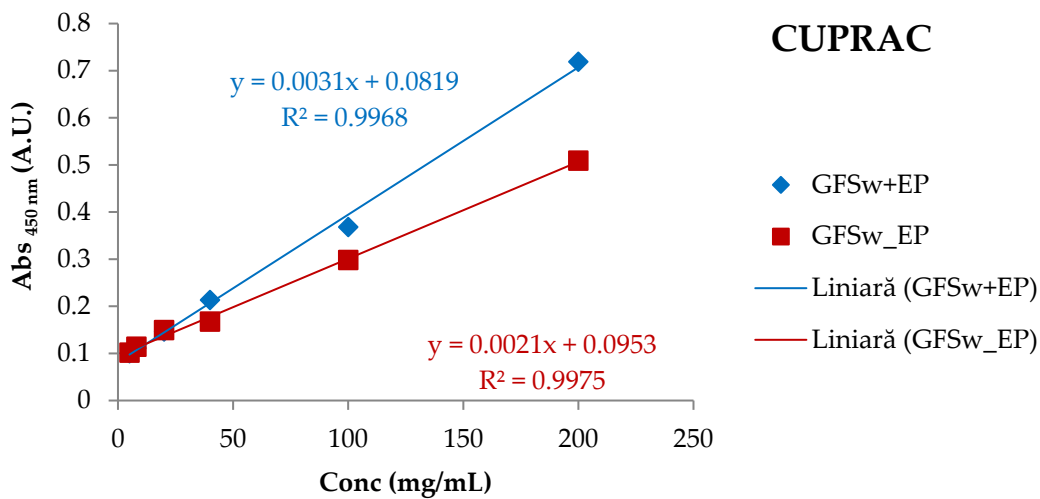

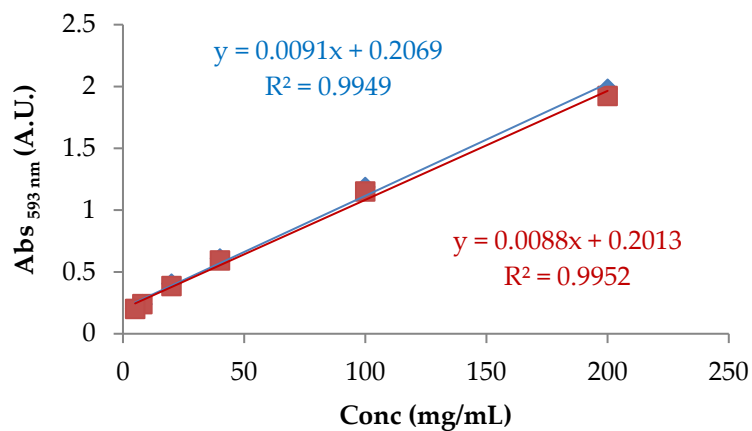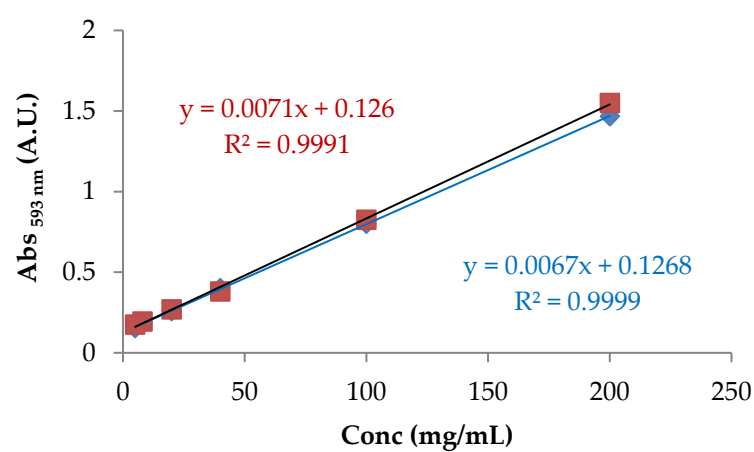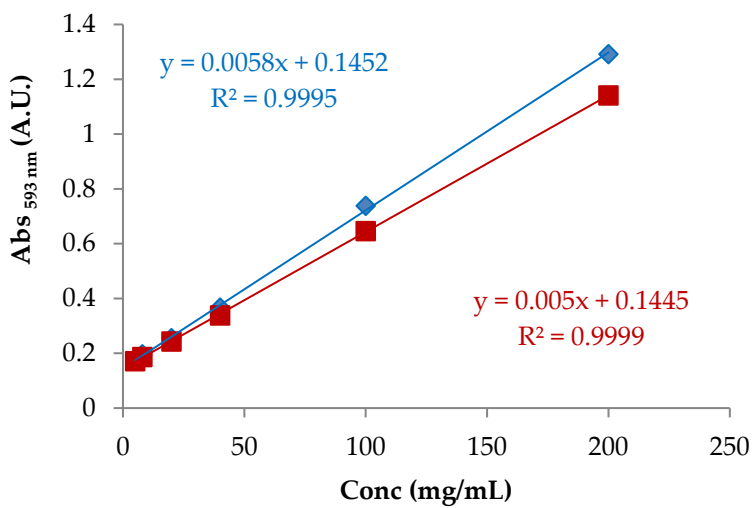



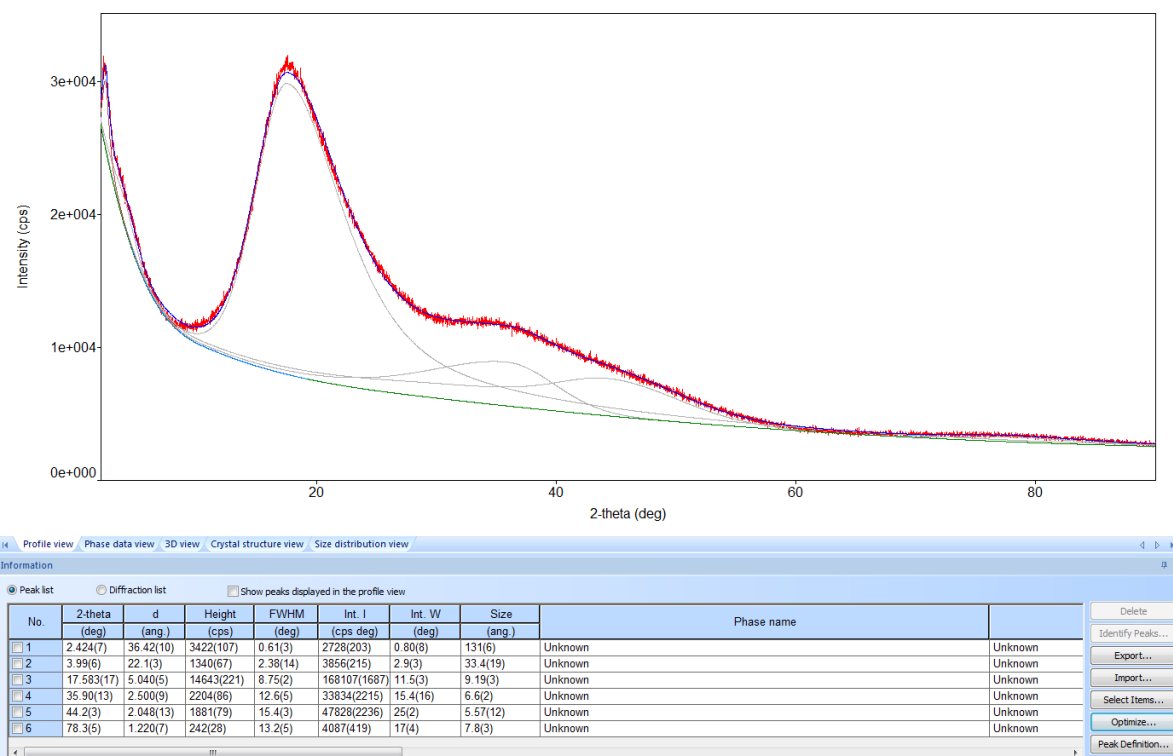

**Figure S5.** Peak deconvolution (4 peaks) of the XRD diffractogram of honey

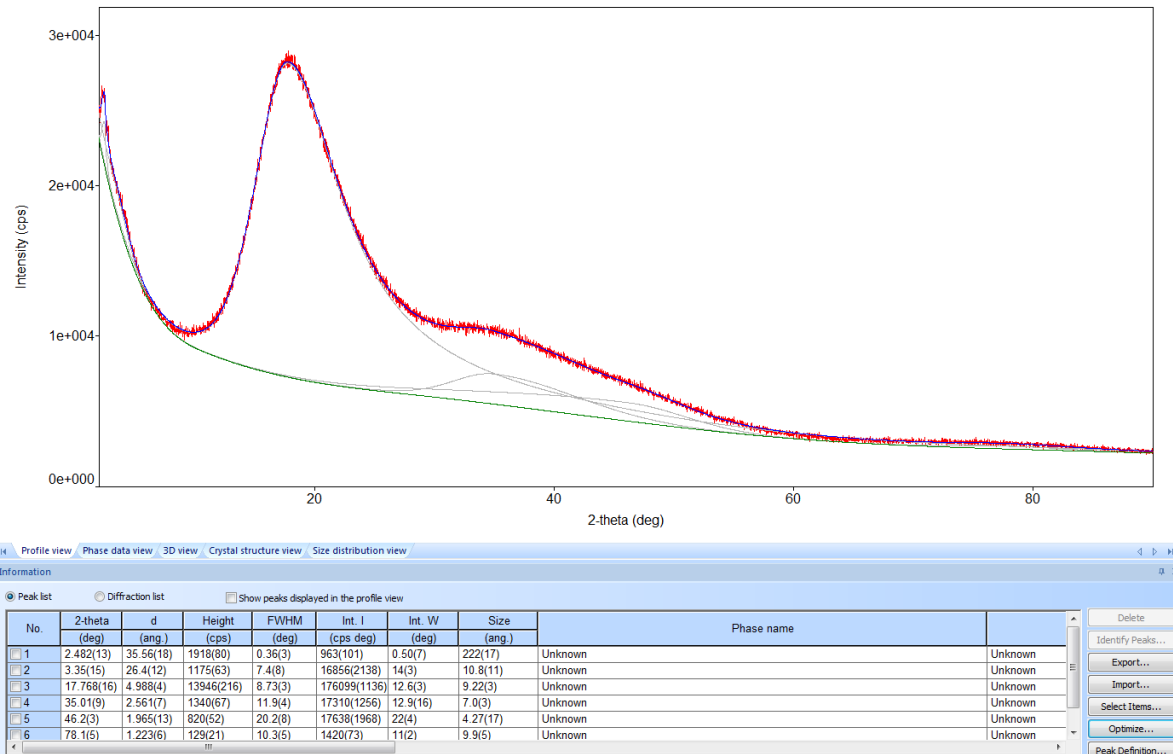

**Figure S6.** Peak deconvolution (4 peaks) of the XRD diffractogram of GFSw

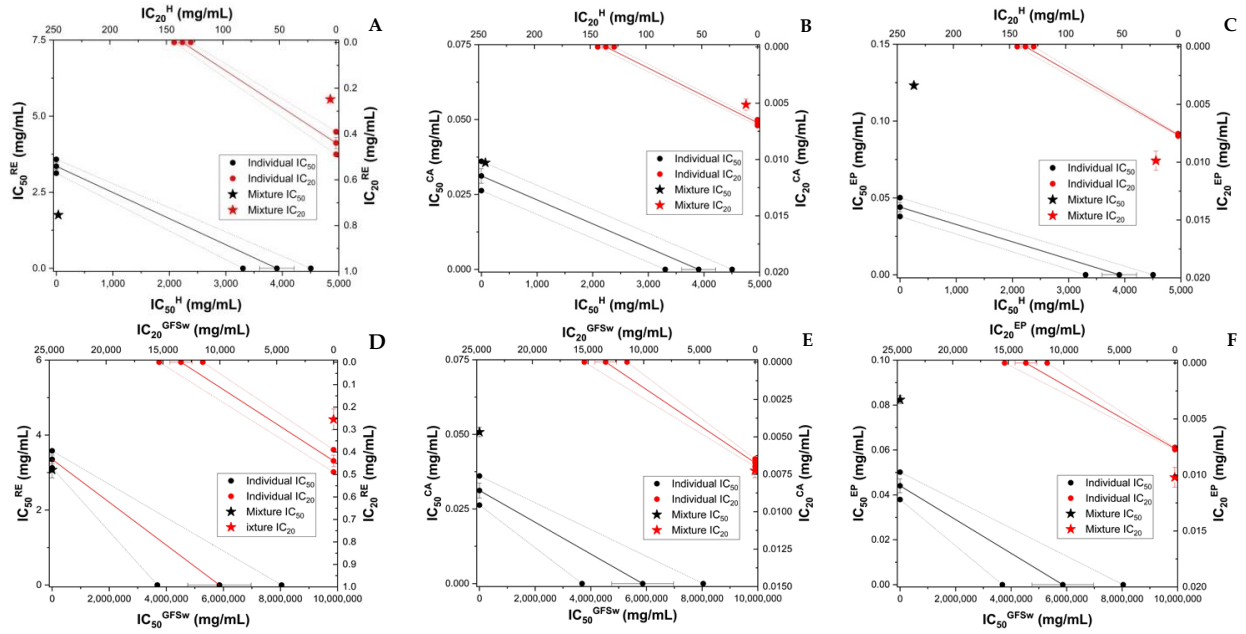

**Figure S7.** Isobolograms based on  $IC_{50}$  (half-maximal inhibitory concentration, black) and  $IC_{20}$  (inhibitory concentration at 20% substrate inhibition, red) by DPPH method for H\_RE (A), H\_CA (B), H\_EP (C), GFSw\_RE (D), GFSw\_CA (E), and GFSw\_EP (F). The error bars from 3 measurements are shown for each value. Confidence intervals at 95% confidence are shown by dashed lines.

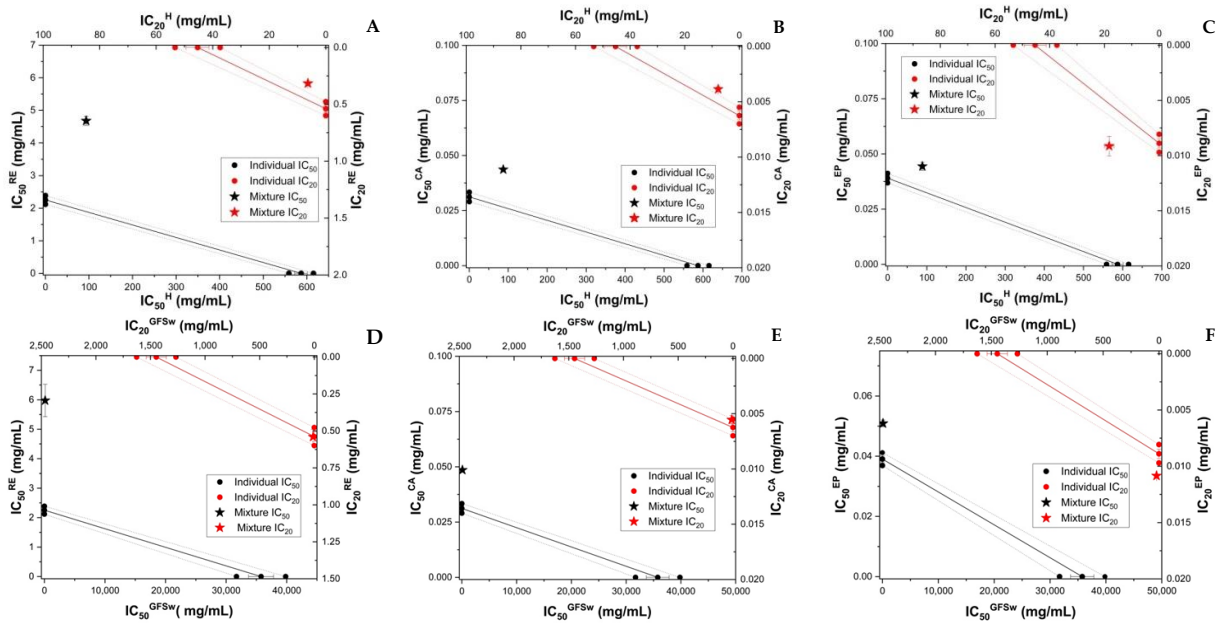

**Figure S8.** Isobolograms based on  $IC_{50}$  (half-maximal inhibitory concentration, black) and  $IC_{20}$  (inhibitory concentration at 20% substrate inhibition, red) by ABTS method for H\_RE (A), H\_CA (B), H\_EP (C), GFSw\_RE (D), GFSw\_CA (E), and GFSw\_EP (F). The error bars from 3 measurements are shown for each value. Confidence intervals at 95% confidence are shown by dashed lines.

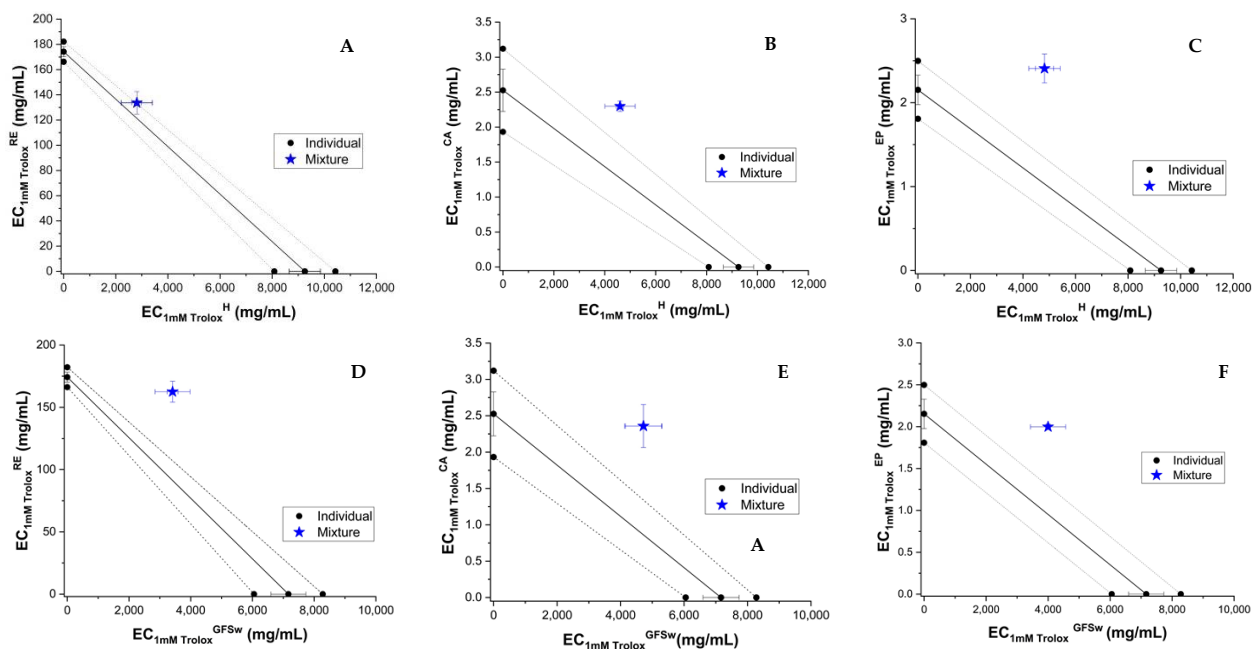

**Figure S9.** Isobolograms based on 1 mM Trolox equivalent by CUPRAC method for  $H_{RE}$  (A) ,  $H_{CA}$  (B),  $H_{EP}$  (C),  $GFSw_{RE}$  (D),  $GFSw_{CA}$  (E), and  $GFSw_{EP}$  (F). The error bars from 3 measurements are shown for each value. Confidence intervals at 95% confidence are shown by dashed lines.

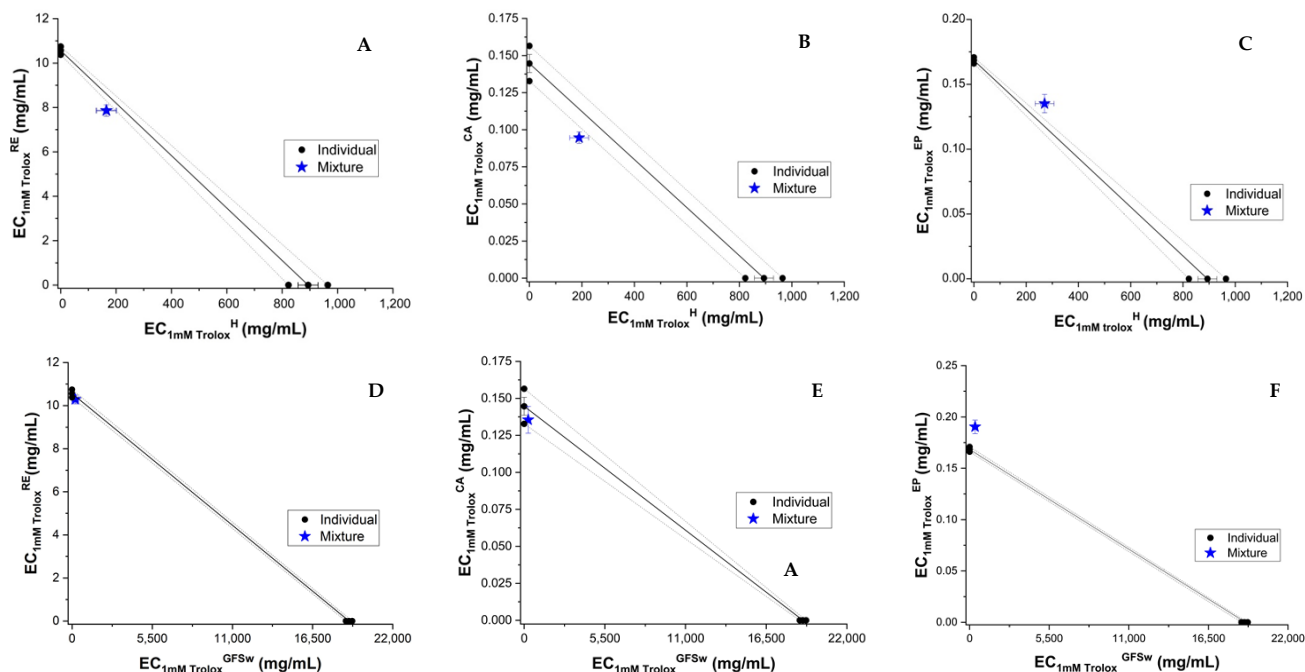

**Figure S10.** Isobolograms based on 1 mM Trolox equivalent by FRAP method for  $H_{RE}$  (A) ,  $H_{CA}$  (B),  $H_{EP}$  (C),  $GFSw_{RE}$  (D),  $GFSw_{CA}$  (E), and  $GFSw_{EP}$  (F). The error bars from 3 measurements are shown for each value. Confidence intervals at 95% confidence are shown by dashed lines.
